# Supplementary material for: Whole-Exome Sequencing Reveals Hippo Pathway Mutations as a Hallmark of Aggressive PTMC in Young Males
Source: Research Square preprint supplement (doi:10.21203/rs.3.rs-7153805/v1), 2025-09-03
Supplement: Supplementary file 1 [file 06c9a4602d4dfddc941da5a2.docx]

| **Gene** | **Primary count** | **Lymph count** | **p-value** | **odds**  **ratio** | **Confidence**  **interval** |
| --- | --- | --- | --- | --- | --- |
| *SPRED3* | 5 | 37 | 8.24E-10 | 0.02938839 | 0.0056–0.1193 |
| *AC236972.4* | 15 | 0 | 1.34E-07 | Inf |  |
| *UVRAG* | 11 | 0 | 1.81E-05 | Inf |  |
| *HCAR2* | 9 | 0 | 0.0001 | Inf |  |
| *OR10G9* | 8 | 0 | 0.0004 | Inf |  |
| *PLPP1* | 7 | 0 | 0.0013 | Inf |  |
| *FAM172A* | 6 | 0 | 0.0038 | Inf |  |
| *FOXD4L3* | 6 | 0 | 0.0038 | Inf |  |
| *PLAAT4* | 6 | 0 | 0.0038 | Inf |  |
| *PCDHB13* | 0 | 10 | 0.0039 | 0 | 0–0.5343 |
| *CTSB* | 5 | 0 | 0.0101 | Inf |  |
| *USP19* | 5 | 0 | 0.0101 | Inf |  |
| *FAT4* | 3 | 16 | 0.0133 | 0.184607555 | 0.0309–0.7542 |
| *OR8B2* | 0 | 8 | 0.0174 | 0 | 0–0.7387 |
| *PARG* | 0 | 8 | 0.0174 | 0 | 0–0.7387 |
| *RASA4B* | 0 | 8 | 0.0174 | 0 | 0–0.7387 |
| *COPS6* | 3 | 14 | 0.0259 | 0.226557008 | 0.0376–0.9412 |
| *CENPJ* | 0 | 7 | 0.0366 | 0 | 0–0.8994 |
| *ADPRHL1* | 0 | 6 | 0.0373 | 0 | 0–1.1120 |
| *CCL3* | 0 | 6 | 0.0373 | 0 | 0–1.1120 |
| *PEX11B* | 0 | 6 | 0.0373 | 0 | 0–1.1120 |
| *RFT1* | 0 | 6 | 0.0373 | 0 | 0–1.1120 |
| *SLFN11* | 0 | 6 | 0.0373 | 0 | 0–1.1120 |
| *SPIN1* | 0 | 6 | 0.0373 | 0 | 0–1.1120 |
| *YBX1* | 0 | 6 | 0.0373 | 0 | 0.9693–1.1120 |
| *PRSS36* | 10 | 5 | 3.6289 | 3.628902 | 0–15.5130 |
