# Supplementary material for: Whole-Exome Sequencing Reveals Hippo Pathway Mutations as a Hallmark of Aggressive PTMC in Young Males
Source: Research Square preprint supplement (doi:10.21203/rs.3.rs-7153805/v1), 2025-09-03
Supplement: Supplementary file 2 [file 4a3feffe9fb59e6aca231ad2.xlsx]

## Sheet: Primary
dbSNP_RS	Frequency	Hugo_Symbol
113488022	20	BRAF
1349478641	16	PLCL2
1197554192	15	AC236972.4
750450365	15	XPC
144392378	12	MAB21L3
112614178	11	OR8B3
762976381	11	UVRAG
1013287791	10	PRSS36
765944456	10	SIGLEC7
141681057	9	ZNF417
676823	9	HCAR2
12380	8	CBWD1
149538549	8	SFTPC
1265978303	7	NUP188
532349136	7	GSTA1
71622181	7	PLPP1
778218904	7	SIGLEC9
1234695941	6	TOPBP1
148158107	6	NDUFV2
199950748	6	TUBA3D
200488155	6	PRH2
201868341	6	OR10H1
560033857	6	FAM172A
74932327	6	PLAAT4
777919566	6	NDUFS3
782772111	6	FOXD4L3
878919102	6	LYSMD4
1189043893	5	USP19
138290543	5	GNB2
386684404	5	SLC6A18
529427270	5	CTSB
532625584	5	FAM222A
770797173	5	OR10G9
10051434	4	PCDHB12
1057288	4	MST1
1183832067	4	RFX5
139690862	4	IFNW1
1432064011	4	TUBB8
144833103	4	SPON1
182234129	4	C12orf42
201875580	4	DLX4
28381969	4	FUT3
769482947	4	FLT3LG
78337553	4	ARHGAP5
114043049	3	FGGY
114445490	3	SRMS
114492585	3	HSPA14
1165644539	3	RAVER2
1200351376	3	TMEM39B
1262984827	3	CRAMP1
1320837712	3	XPNPEP2
13306591	3	NR3C2
1366903619	3	GPNMB
1377637341	3	AC236972.4
138459969	3	CFAP206
139397709	3	ZNF623
1396040977	3	RAP1GDS1
142162144	3	OR1S1
143881602	3	KCNH7
145752834	3	OR10G9
1459453520	3	POU4F3
1484481314	3	DIRAS2
148864416	3	MAN2B2
1805004	3	CCKBR
184570389	3	CDRT4
188290387	3	SUPT7L
192332230	3	DCAF11
192548183	3	DDX18
200170353	3	MPZL2
200481059	3	OR10G4
201229911	3	APOA5
201454642	3	KRTAP9-8
201699769	3	MISP
202105093	3	ARHGDIG
3746700	3	FASTKD5
4114328	3	POTEI
529922380	3	PTMA
557673910	3	ZNF98
746804941	3	KRTAP13-3
748128281	3	DLX4
76320766	3	ZSCAN10
769644738	3	COPS6
770553171	3	SLC2A3
779049390	3	OR8G5
782246825	3	PCDHB2
972395402	3	TMEM114
979369776	3	RPL10

## Sheet: Lymph node
dbSNP_RS	Frequency	Hugo_Symbol
113488022	25	BRAF
1349478641	22	PLCL2
141681057	16	ZNF417
112614178	15	OR8B3
148158107	15	NDUFV2
769644738	14	COPS6
149538549	13	SFTPC
765944456	13	SIGLEC7
1183832067	12	RFX5
12380	12	CBWD1
144392378	11	MAB21L3
201454642	10	KRTAP9-8
2860677	10	PCDHB13
1366903619	9	GPNMB
532349136	9	GSTA1
1243634145	8	PARG
61911135	8	OR8B2
746316	8	RASA4B
116981543	7	CENPJ
200488155	7	PRH2
78337553	7	ARHGAP5
878919102	7	LYSMD4
1130374	6	CCL3
1165644539	6	RAVER2
1234695941	6	TOPBP1
1396040977	6	RAP1GDS1
1419978847	6	SPIN1
1432064011	6	TUBB8
151322409	6	RFT1
199950748	6	TUBA3D
200741644	6	YBX1
201868341	6	OR10H1
756770381	6	SLFN11
782357499	6	PEX11B
1013287791	5	PRSS36
1034287357	5	IL32
1064823	5	TUBA1B
115443559	5	NPY4R2
1228002252	5	DUSP8
1262984827	5	CRAMP1
1278602475	5	NOD1
140173974	5	CD200R1L
1487322926	5	SYTL1
200106152	5	GNAQ
201033884	5	KLHL2
386684404	5	SLC6A18
762023446	5	AVEN
782246825	5	PCDHB2
979369776	5	RPL10
1057516631	4	FAH
1265978303	4	NUP188
1282573346	4	AVL9
1377501231	4	RGPD3
138290543	4	GNB2
199664059	4	ZNF302
367776534	4	C6orf163
557673910	4	ZNF98
574801192	4	GNPTG
61914259	4	KRT86
75646352	4	CADM2
764807037	4	ELFN1
769482947	4	FLT3LG
775311376	4	FKBP9
78146997	4	TMEM132B
782799609	4	TRIM74
78410857	4	OR5H14
934832657	4	RAX2
1003503429	3	ADPRHL1
10051434	3	PCDHB12
1045405533	3	TMEM80
1057288	3	MST1
11063332	3	GALNT8
111482565	3	DUOX1
11547498	3	RHBDD2
117557829	3	CEP152
117576731	3	ADGRA3
1177838690	3	FBXW12
1204518833	3	ANXA3
1218377282	3	GOLGB1
1235127677	3	METTL9
1239694222	3	ADGRB1
1362624582	3	GPALPP1
1363072007	3	OR1N1
1371491913	3	GALNT8
1384177446	3	P2RX4
138900405	3	PILRA
140085659	3	EXOG
141911009	3	CARD16
143785583	3	PPAN-P2RY11
143790069	3	THBS1
143806879	3	ZFYVE16
144952478	3	DTHD1
145374370	3	PDC
145677992	3	EPS8L3
145889214	3	IPO9
1459453520	3	POU4F3
146093416	3	ARHGEF16
147122262	3	TSGA10IP
147919844	3	PSTK
148634347	3	PCSK7
1487473849	3	AC135068.1
149266330	3	TMEM86B
150532549	3	OR10G7
182247772	3	C2orf78
185691977	3	SLC25A36
188652921	3	LRTM2
189541232	3	NUGGC
189701030	3	CALHM5
191869730	3	BBX
193045218	3	OR51M1
199706458	3	FCRL5
199773047	3	FAM98A
199789262	3	PFAS
199901947	3	SURF6
200312744	3	OR5L1
200481059	3	OR10G4
200791116	3	TYK2
201193616	3	CYP26B1
202004998	3	RETREG3
28399430	3	CYP1A1
3752078	3	ZNF236
376171417	3	FAM153B
532212574	3	ZNF627
532625584	3	FAM222A
539710409	3	PPP1R37
547316827	3	RILP
549735716	3	SOX30
62266800	3	OR5H15
747343088	3	SYF2
748128281	3	DLX4
751891200	3	LMOD1
757027529	3	RNF216
757723965	3	KRTAP13-3
76012715	3	C12orf29
761984079	3	TSR1
767494215	3	ROPN1
77305684	3	PMPCB
777543909	3	ALG10
777919566	3	NDUFS3
778218904	3	SIGLEC9
779049390	3	OR8G5
780791311	3	GSTA5
782137513	3	PARP10
782195517	3	AKR1C2
79962962	3	OR13C3
80176276	3	BFSP2
879078655	3	SPDYE21
910112698	3	ADPRHL1
914914054	3	MIGA2
